# Supplementary material
Source: Royal Society of Chemistry journal article supplement (doi:10.1039/d6cp01488g)
Supplement: d6cp01488g1.pdf [file d6cp01488g1.pdf]

## **Intercalation of DNA Nucleobases inside Bilayer Graphene and Bilayer MoS<sub>2</sub>: A Comparative DFT Study**

Arzoo Hassan,<sup>a</sup> Andleeb Mehmood,<sup>b</sup> Fareesa Tasneem Tahir,<sup>a</sup> Umer Younis,<sup>c</sup> Muhammad Yar Khan<sup>d</sup>,  
Xiaoqing Tian<sup>a, e \*</sup>, and Qing-Feng Sun<sup>f</sup>

<sup>a</sup> College of Physics and Optoelectronic Engineering, Shenzhen University, Shenzhen 518060, China

<sup>b</sup> Institution for carbon neutrality, Zhejiang Wanli University, Ningbo, Zhejiang 31500, China

<sup>c</sup> Department of Chemistry, Southern University of Science and Technology, Shenzhen, Guangdong,  
518055, China

<sup>d</sup> Department of Physics, Qilu Institute of Technology, Jinan Shandong Province, Jinan 250200, P.R. China

<sup>e</sup> National Laboratory of Solid-State Microstructures, Nanjing University, Nanjing 210093, China

<sup>f</sup> International Center for Quantum Materials, School of Physics, Peking University, Beijing, 100871, China

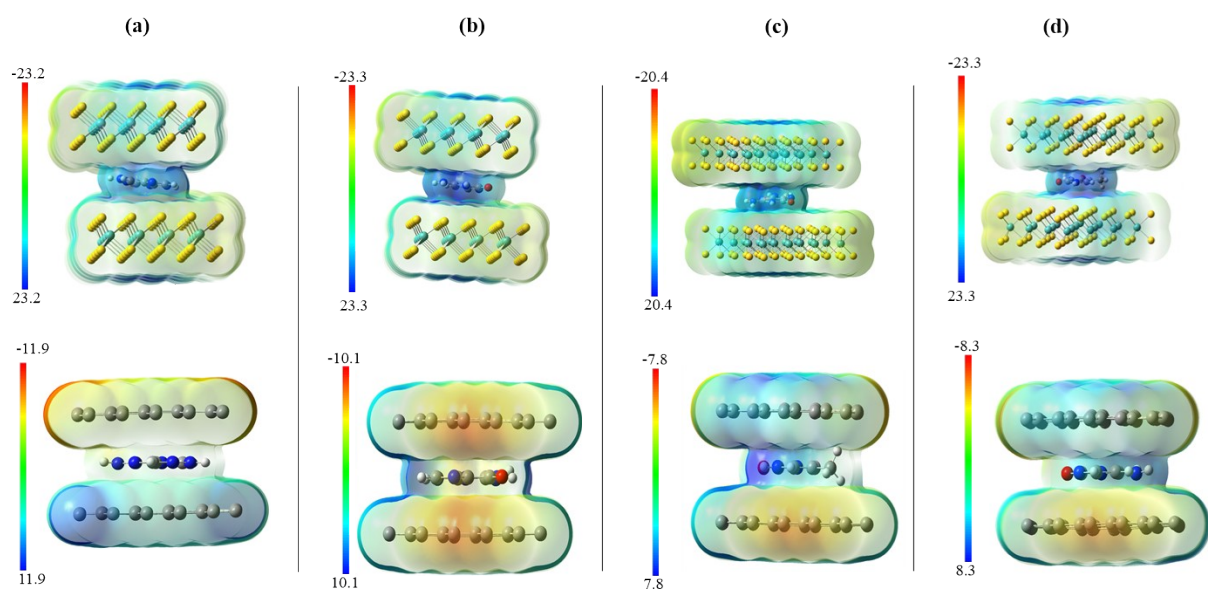

Fig. S1. (I) MESP of BL MoS<sub>2</sub> and BLG surface model and DNA nucleic bases (**a** adenine, **b** cytosine, **c** guanine, and **d** thymine) using the M062X/6-31G\* level of theory

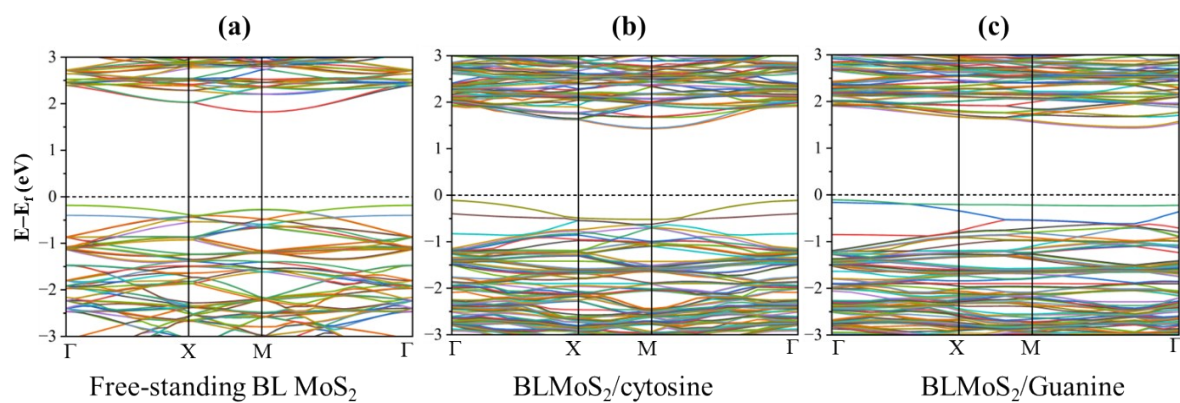

Figure S2. Total electronic band structure of (a) BLMoS<sub>2</sub> and BLMoS<sub>2</sub>-nucleobase complexes with (b) cytosine, and (c) guanine.
